# Supplementary material for: Establishing empirical design rules of nucleic acid templates for the synthesis of silver nanoclusters with tunable photoluminescence and functionalities towards targeted bioimaging applications
Source: Royal Society of Chemistry journal article supplement (doi:10.1039/d0na00381f), 2020-01-01
Supplement: d0na00381f1.pdf [file d0na00381f1.pdf]

## Supporting Information

### **Establishing Empirical Design Rules of Nucleic Acid Templates for Synthesis of Silver Nanoclusters with Tunable Photoluminescence and Functionalities Towards Targeted Bioimaging Applications**

Jason Y.C. Lim,<sup>†,a</sup> Yong Yu,<sup>†,a</sup> Guorui Jin,<sup>a</sup> Kai Li,<sup>a</sup> Yi Lu,<sup>b</sup> Jianping Xie,<sup>c</sup> Yen Nee Tan<sup>\*,a,d</sup>

<sup>a</sup> Institute of Materials Research and Engineering, the Agency for Science, Technology and Research (A\*STAR), 2 Fusionopolis Way, #08-03, Innovis 138634, Singapore  
E-mail: [tanyn@imre.a-star.edu.sg](mailto:tanyn@imre.a-star.edu.sg)

<sup>b</sup> Department of Chemistry, University of Illinois at Urbana-Champaign, Urbana, IL 61801, United State

<sup>c</sup> Department of Chemical and Biomolecular Engineering, National University of Singapore, 10 Kent Ridge Crescent 119260, Singapore

<sup>d</sup> Faculty of Science, Agriculture & Engineering, Newcastle University, Newcastle Upon Tyne NE1 7RU, United Kingdom  
E-mail: [yennee.tan@newcastle.ac.uk](mailto:yennee.tan@newcastle.ac.uk)

<sup>†</sup>Equal contribution

**\*Corresponding Author**

**A/Prof. Yen Nee Tan** (Email: [yennee.tan@newcastle.ac.uk](mailto:yennee.tan@newcastle.ac.uk))

**Table S1.** Single-stranded DNA nucleotide sequences used in the present study.

|                                 | Abbreviated Sequence             | Full Sequence                  |
|---------------------------------|----------------------------------|--------------------------------|
| Homo-oligonucleotides           | dC <sub>20</sub>                 | 5'-CCCCC CCCCC CCCCC CCCCC-3'  |
|                                 | dG <sub>20</sub>                 | 5'-GGGGG GGGGG GGGGG GGGGG-3'  |
|                                 | dA <sub>20</sub>                 | 5'-AAAAA AAAAA AAAAA AAAAA-3'  |
|                                 | dT <sub>20</sub>                 | 5'-TTTTT TTTTT TTTTT TTTTT-3'  |
| 2-base sequences                | dC <sub>15</sub> G <sub>5</sub>  | 5'-CCCCC CCCCC CCCCC GGGGG-3'  |
|                                 | dC <sub>10</sub> G <sub>10</sub> | 5'-CCCCC CCCCC GGGGG GGGGG-3'  |
|                                 | dC <sub>5</sub> G <sub>15</sub>  | 5'-CCCCCC GGGGG GGGGG GGGGG-3' |
|                                 | dC <sub>15</sub> A <sub>5</sub>  | 5'- CCCCC CCCCC CCCCC AAAAA-3' |
|                                 | dC <sub>10</sub> A <sub>10</sub> | 5'-CCCCC CCCCC AAAAA AAAAA-3'  |
|                                 | dC <sub>5</sub> A <sub>15</sub>  | 5'-CCCCC AAAAA AAAAA AAAAA-3'  |
|                                 | dC <sub>15</sub> T <sub>5</sub>  | 5'- CCCCC CCCCC CCCCC TTTTT-3' |
|                                 | dC <sub>10</sub> T <sub>10</sub> | 5'-CCCCC CCCCC TTTTT TTTTT-3'  |
|                                 | dC <sub>5</sub> T <sub>15</sub>  | 5'- CCCCC TTTTT TTTTT TTTTT-3' |
|                                 | dG <sub>15</sub> A <sub>5</sub>  | 5'-GGGGG GGGGG GGGGG AAAAA-3'  |
|                                 | dG <sub>10</sub> A <sub>10</sub> | 5'-GGGGG GGGGG AAAAA AAAAA-3'  |
|                                 | dG <sub>5</sub> A <sub>15</sub>  | 5'-GGGGG AAAAA AAAAA AAAAA-3'  |
|                                 | dG <sub>15</sub> T <sub>5</sub>  | 5'-GGGGG GGGGG GGGGG TTTTT-3'  |
|                                 | dG <sub>10</sub> T <sub>10</sub> | 5'-GGGGG GGGGG TTTTT TTTTT-3'  |
|                                 | dG <sub>5</sub> T <sub>15</sub>  | 5'-GGGGG TTTTT TTTTT TTTTT-3'  |
|                                 | dA <sub>15</sub> T <sub>5</sub>  | 5'-AAAAA AAAAA AAAAA AAAAA-3'  |
|                                 | dA <sub>10</sub> T <sub>10</sub> | 5'-AAAAA AAAAA TTTTT TTTTT-3'  |
| dA <sub>5</sub> T <sub>15</sub> | 5'-AAAAA TTTTT TTTTT TTTTT-3'    |                                |
| Interdigitated sequences        | d(CA) <sub>10</sub>              | 5'-CACAC ACACA CACAC ACACA-3'  |
|                                 | d(CT) <sub>10</sub>              | 5'-CTCTC TCTCT CTCTC TCTCT-3'  |
|                                 | d(GA) <sub>10</sub>              | 5'-GAGAG AGAGA GAGAG AGAGA-3'  |
|                                 | d(CG) <sub>10</sub>              | 5'-CGCGC GCGCG CGCGC GCGCG-3'  |

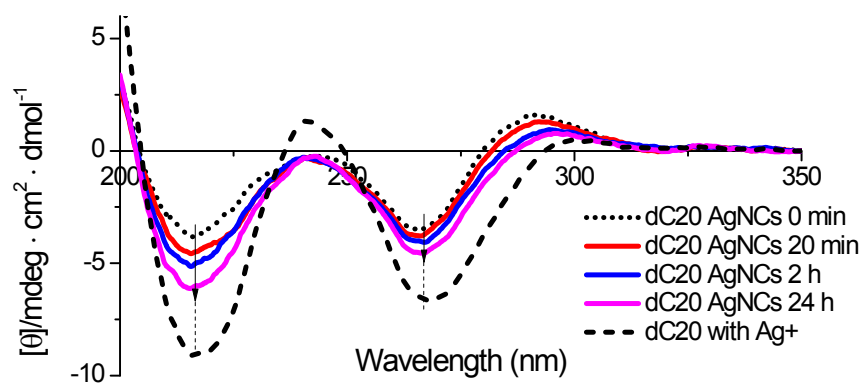

**Fig. S1.** Circular dichroism spectra showing the aging effects on the supramolecular structure of dC<sub>20</sub>-templated AgNC at different time. CD spectra of DNA mixed with Ag<sup>+</sup> (dashed line) and dC<sub>20</sub>-AgNC immediately formed (ageing time = 0 min; dotted line) are included here for easier reference.

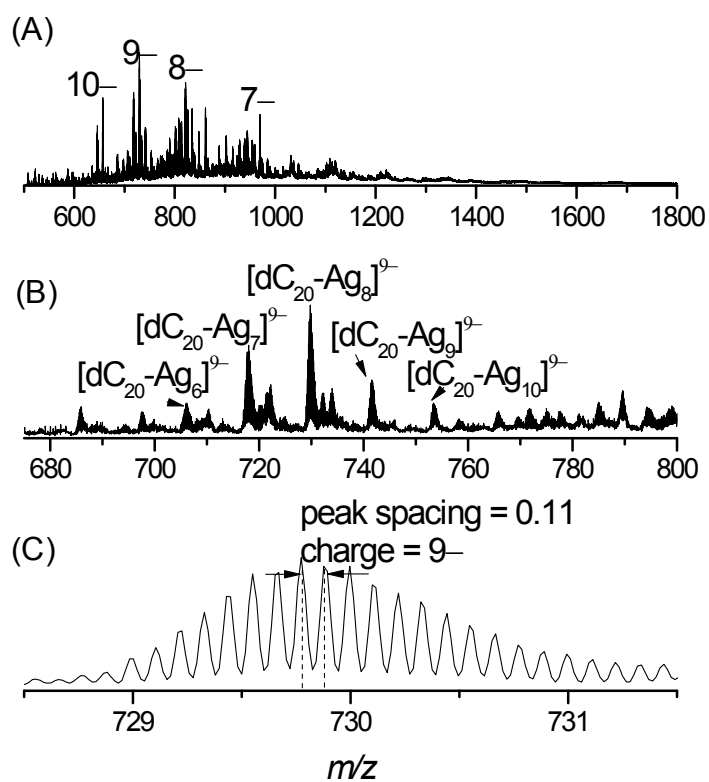

**Fig. S2.** (A) Wide range ESI mass spectrum of dC<sub>20</sub>-AgNCs (the number represents the charge of ionized species) and (B) zoomed-in mass spectrum of the 9<sup>-</sup> peak in (A) showing AgNCs with 6–10 Ag atoms; (C) isotope pattern of the [dC<sub>20</sub>-Ag<sub>8</sub>]<sup>9-</sup> peak in (B).

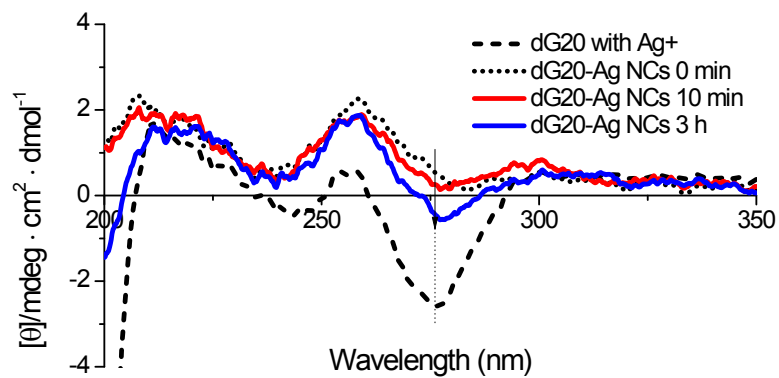

**Fig. S3.** Circular dichroism spectra showing the aging effects on the supramolecular structure of dG<sub>20</sub>-templated AgNC at different time. The CD spectra of DNA mixed with Ag<sup>+</sup> (dashed line) and dG<sub>20</sub>-AgNC immediately formed (ageing time = 0 min; dotted line) are included here for easier reference.

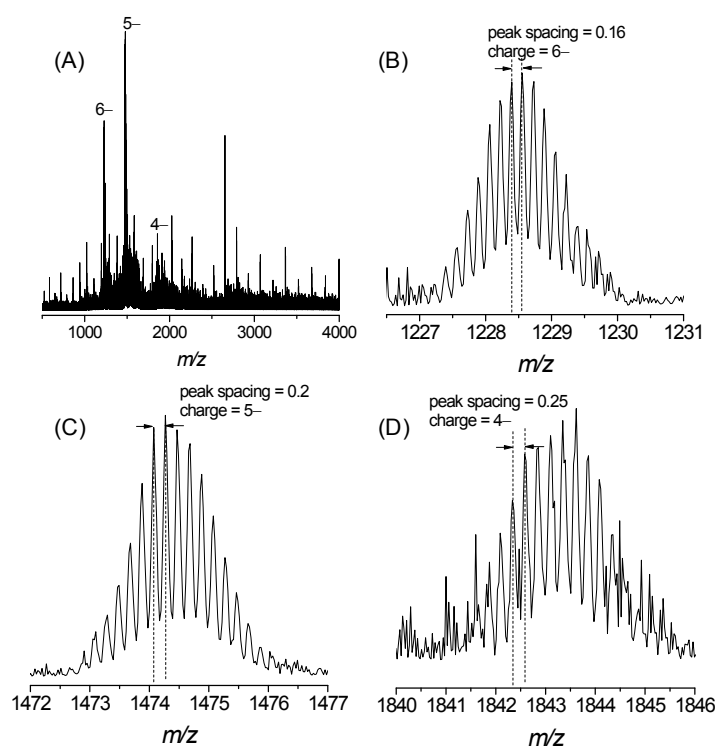

**Fig. S4.** (A) Wide range ESI mass spectrum of dG<sub>20</sub>-Ag<sub>8</sub>NCs and (B-D) isotope patterns determining the charges of major peaks observed in (A).

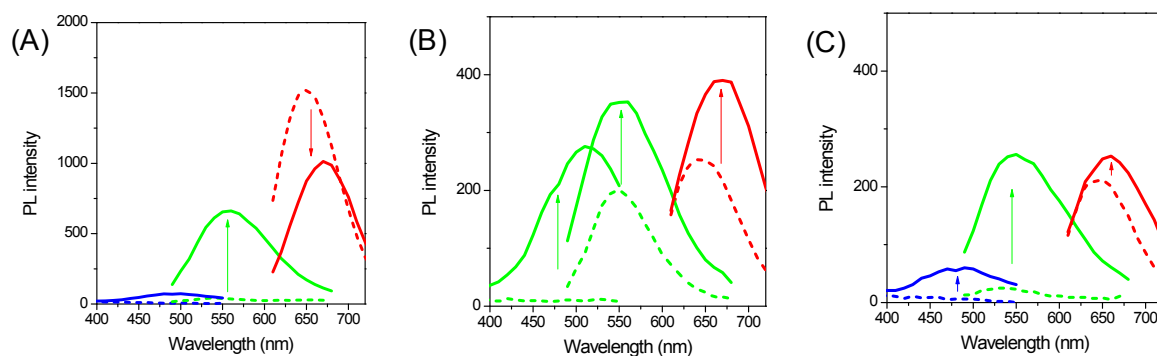

**Fig. S5.** Photoluminescence spectra of freshly prepared ( $t = 0.3$  h, dash lines) and aged ( $t = 24$  h, solid lines) AgNCs templated by (A)  $dC_{15}A_5$ , (B)  $dC_{10}A_{10}$ , (C)  $dC_5A_{15}$  DNA sequences. The blue, green and red emission spectra were obtained at the excitation wavelength ( $\lambda_{ex}$ ) of 340, 450 and 570 nm respectively.

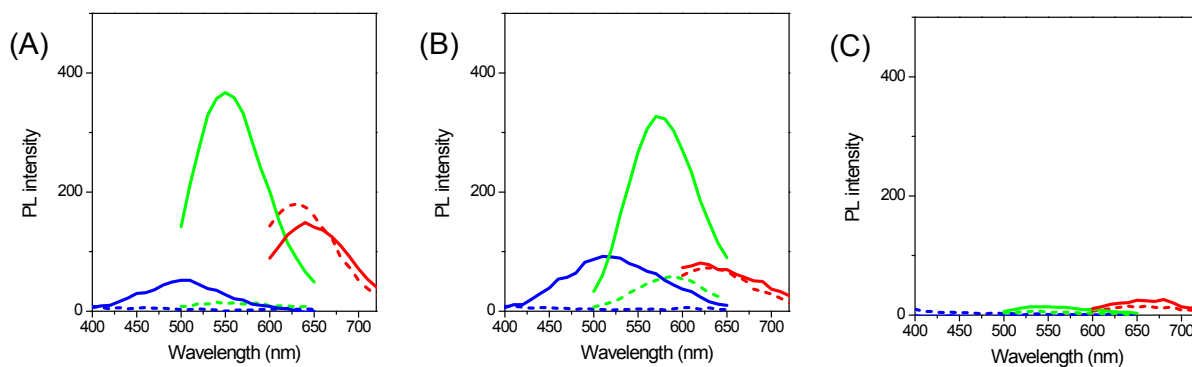

**Fig. S6.** Photoluminescence spectra of freshly prepared ( $t = 0.3$  h, dash lines) and aged ( $t = 24$  h, solid lines) AgNCs templated by (A) dC<sub>15</sub>T<sub>5</sub>, (B) dC<sub>10</sub>T<sub>10</sub>, (C) dC<sub>5</sub>T<sub>15</sub> DNA sequences. The blue, green and red emission spectra were obtained at  $\lambda_{\text{ex}} = 340, 450$  and  $540$  nm respectively.



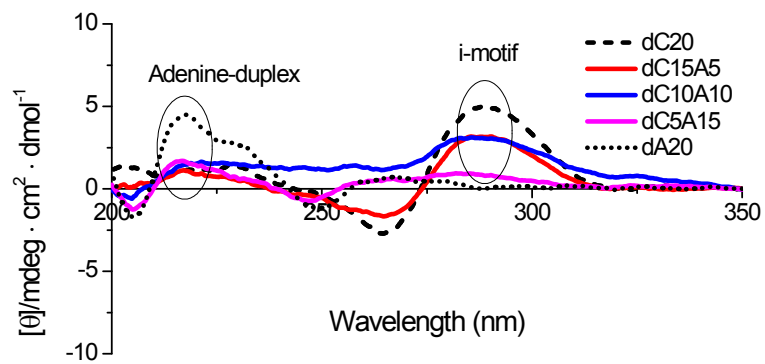

**Fig. S7.** Circular dichroism spectra of the 5'-d[C<sub>5n</sub>A<sub>(20-5n)</sub>]-3' DNA sequences (n is an integer from 0 to 4).

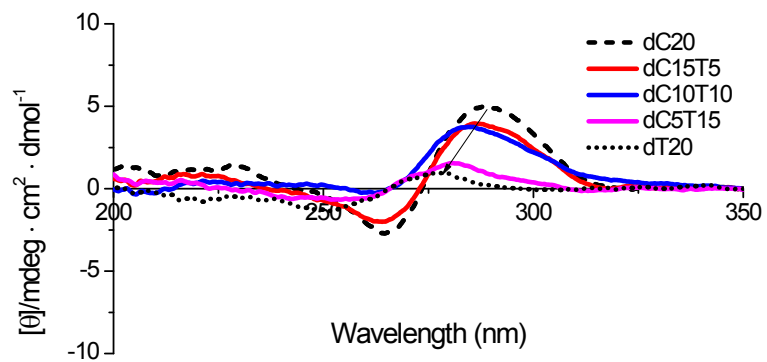

**Fig. S8.** Circular dichroism spectra of the 5'-d[C<sub>5n</sub>T<sub>(20-5n)</sub>]-3' DNA sequences (n is an integer from 0 to 4).

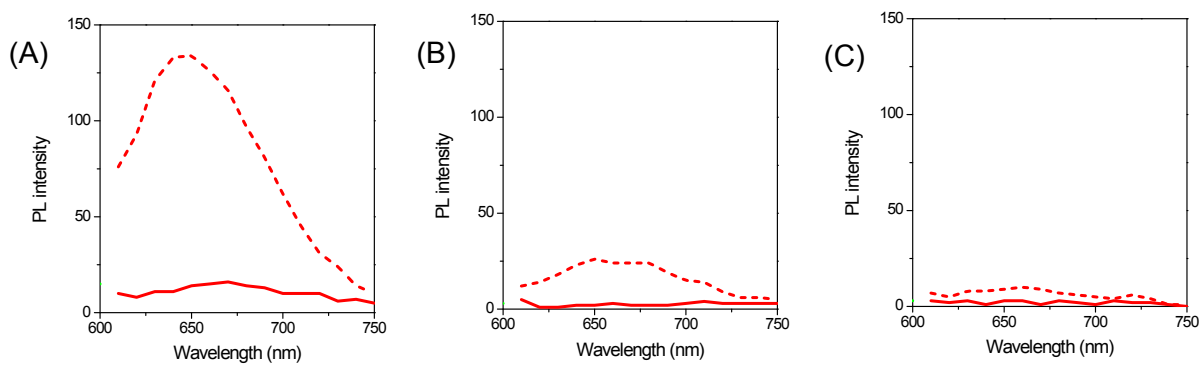

**Fig. S9.** Photoluminescence spectra of freshly prepared ( $t = 0.3$  h, dash lines) and aged ( $t = 24$  h, solid lines) AgNCs templated by (A) dG<sub>15</sub>T<sub>5</sub>, (B) dG<sub>10</sub>T<sub>10</sub>, (C) dG<sub>5</sub>T<sub>15</sub> DNA sequences ( $\lambda_{\text{ex}} = 580$  nm).

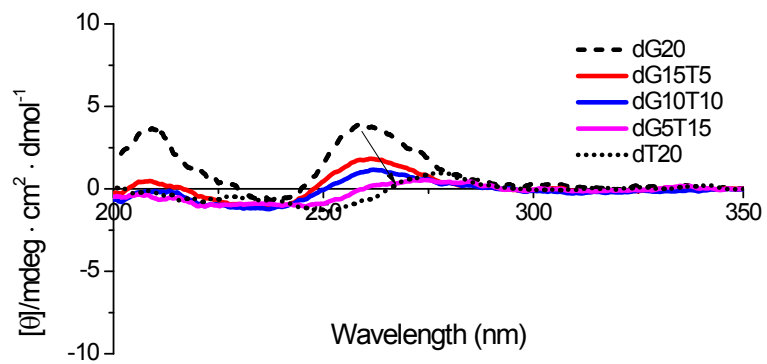

**Fig. S10.** Circular dichroism spectra of the 5'-d[G<sub>5n</sub>T<sub>(20-5n)</sub>]-3' DNA sequences (n is an integer from 0 to 4).

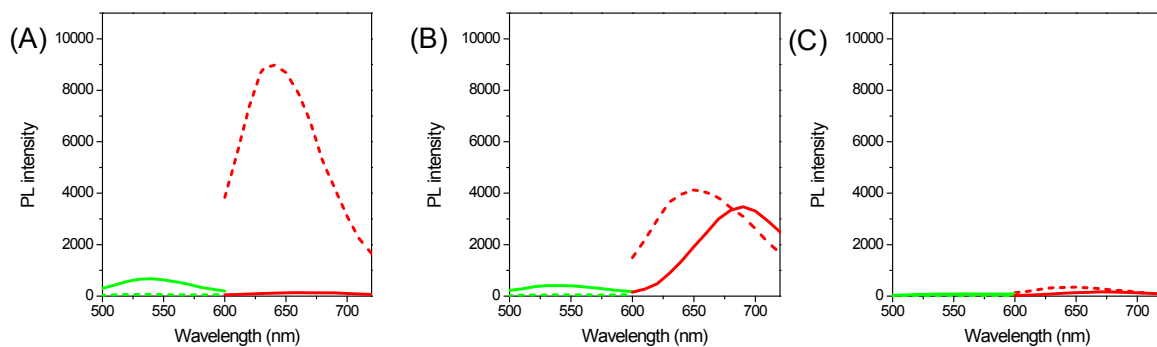

**Fig. S11.** Photoluminescence spectra of freshly prepared ( $t = 0.3$  h, dash lines) and aged ( $t = 24$  h, solid lines) AgNCs templated by (A) dC<sub>15</sub>G<sub>5</sub>, (B) dC<sub>10</sub>G<sub>10</sub>, (C) dC<sub>5</sub>G<sub>15</sub> DNA sequences. The green and red emission spectra were obtained at  $\lambda_{\text{ex}} = 440$  and 570 nm respectively.

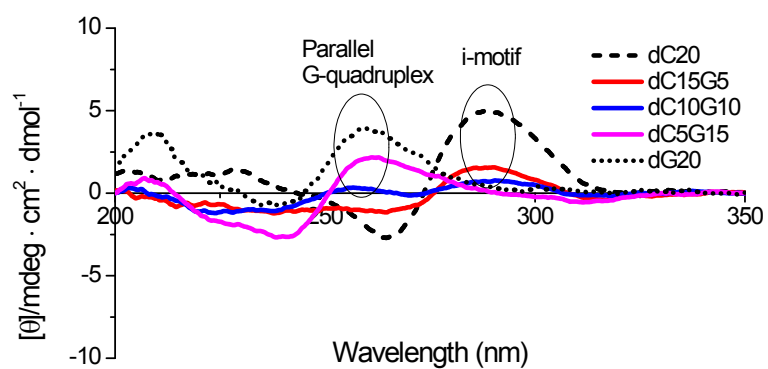

**Fig. S12.** Circular dichroism spectra of the 5'-d[C<sub>5n</sub> G<sub>(20-5n)</sub>]-3' DNA sequences (n is an integer from 0 to 4).

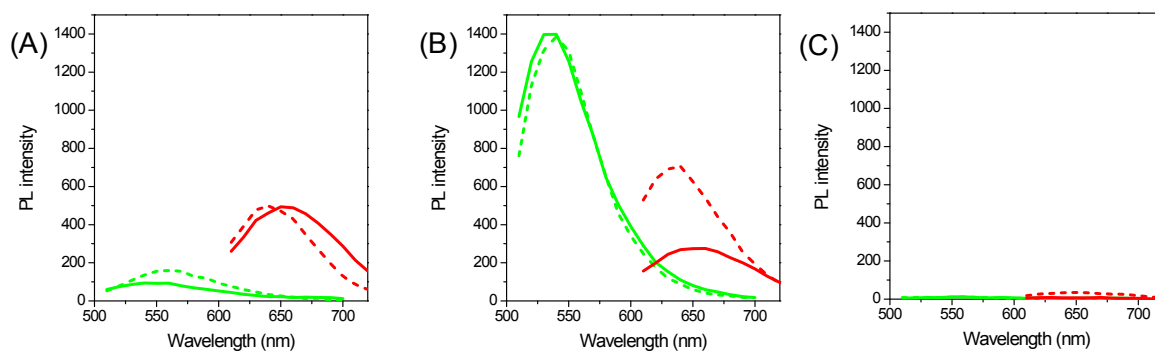

**Fig. S13.** Photoluminescence spectra of freshly prepared ( $t = 0.3$  h, dash lines) and aged ( $t = 24$  h, solid lines) AgNCs templated by (A) dG<sub>15</sub>A<sub>5</sub>, (B) dG<sub>10</sub>A<sub>10</sub>, (C) dG<sub>5</sub>A<sub>15</sub> DNA sequences. The green and red emission spectra were obtained at  $\lambda_{\text{ex}} = 470$  and 570 nm respectively.

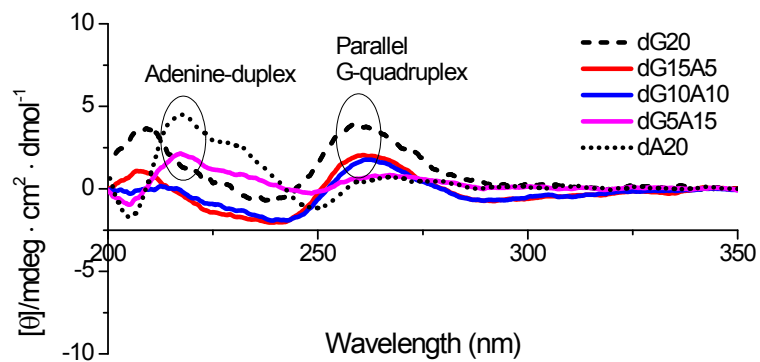

**Fig. S14.** Circular dichroism spectra of the 5'-d[G<sub>5n</sub> A<sub>(20-5n)</sub>]-3' DNA sequences (n is an integer from 0 to 4).



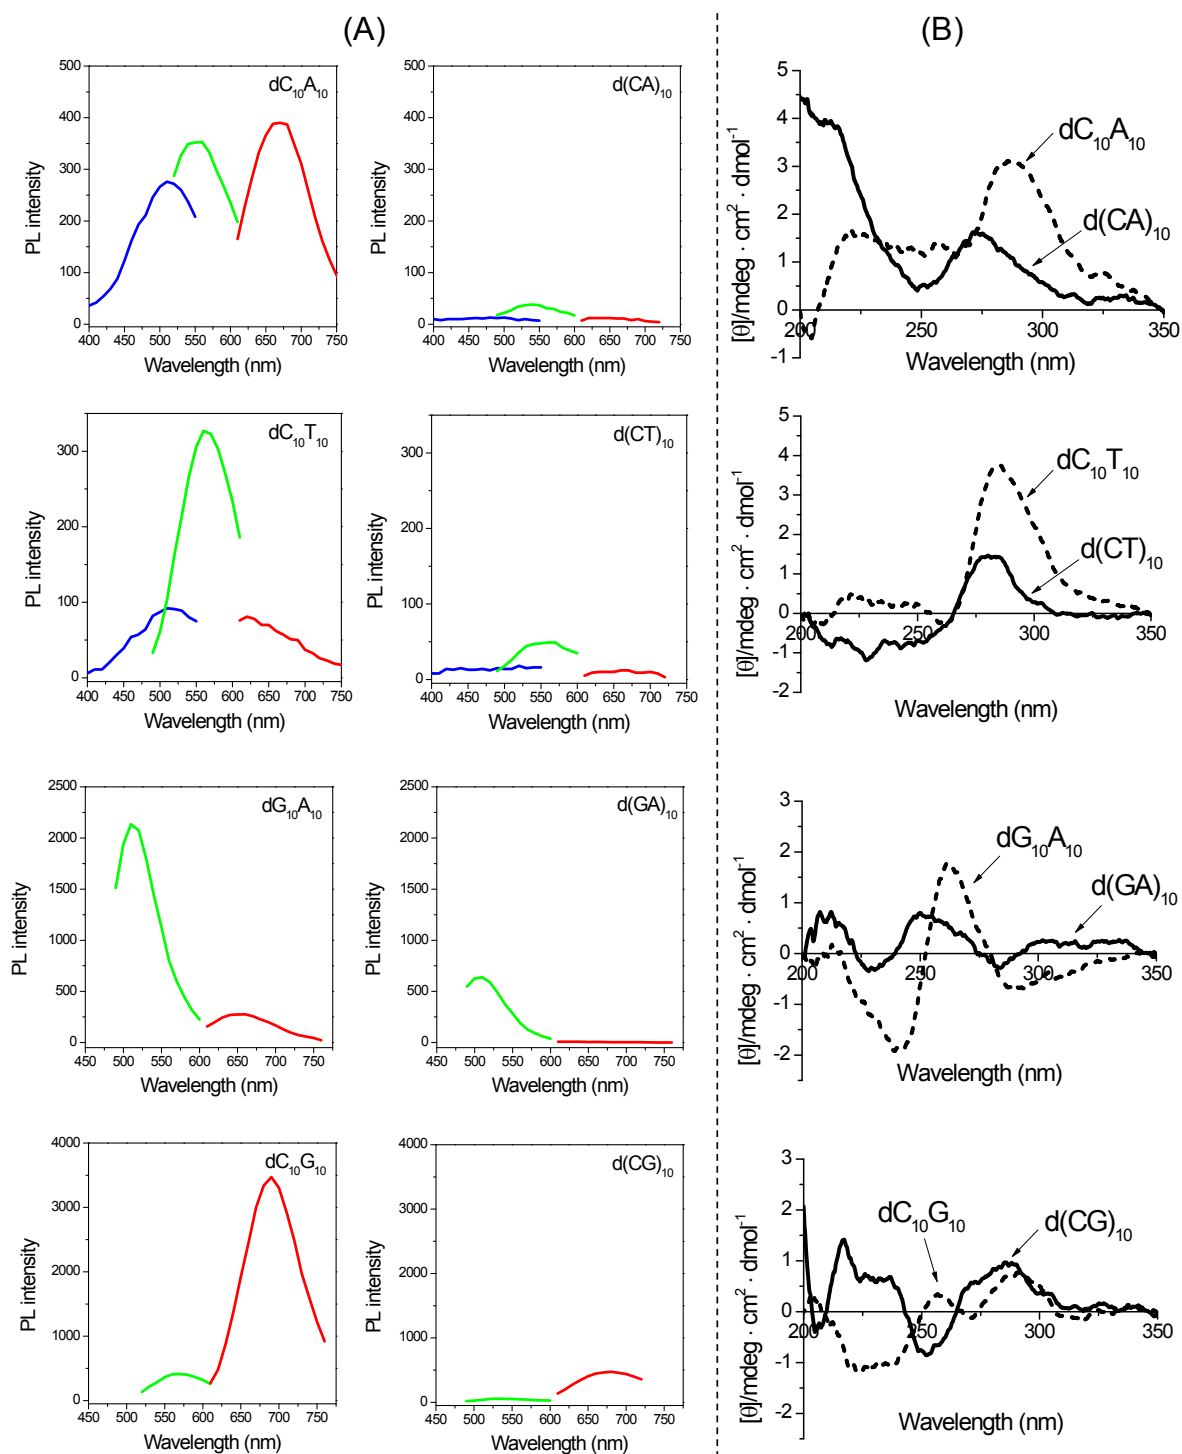

**Fig. S15.** (A) Fluorescence spectra of AgNCs templated by dC<sub>10</sub>A<sub>10</sub>, dC<sub>10</sub>T<sub>10</sub>, dG<sub>10</sub>A<sub>10</sub>, dC<sub>10</sub>G<sub>10</sub> and their interdigitated counterparts (middle panel) bearing the general formula of d(XY)<sub>10</sub>. All fluorescence spectra were taken at 24 hours after the AgNCs were synthesised. For cytosine-containing sequences,  $\lambda_{\text{ex}}$  for blue, green and red emissions are 340, 450 and 570 nm respectively, whilst for guanine-containing sequences,  $\lambda_{\text{ex}}$  for green and red emissions are 470 and 570 nm respectively (B) CD spectra of the dX<sub>10</sub>Y<sub>10</sub> (dashed lines) and d(XY)<sub>10</sub> DNA sequences (solid lines) in aqueous solution.
